# Supplementary material for: Ohmic Heating Extract of Vine Pruning Residue Has Anti-Colorectal Cancer Activity and Increases Sensitivity to the Chemotherapeutic Drug 5-FU
Source: MDPI journal article supplement (doi:10.3390/foods9081102), 2020-08-12
Supplement: s1 [file s1]

## Supplementary Materials

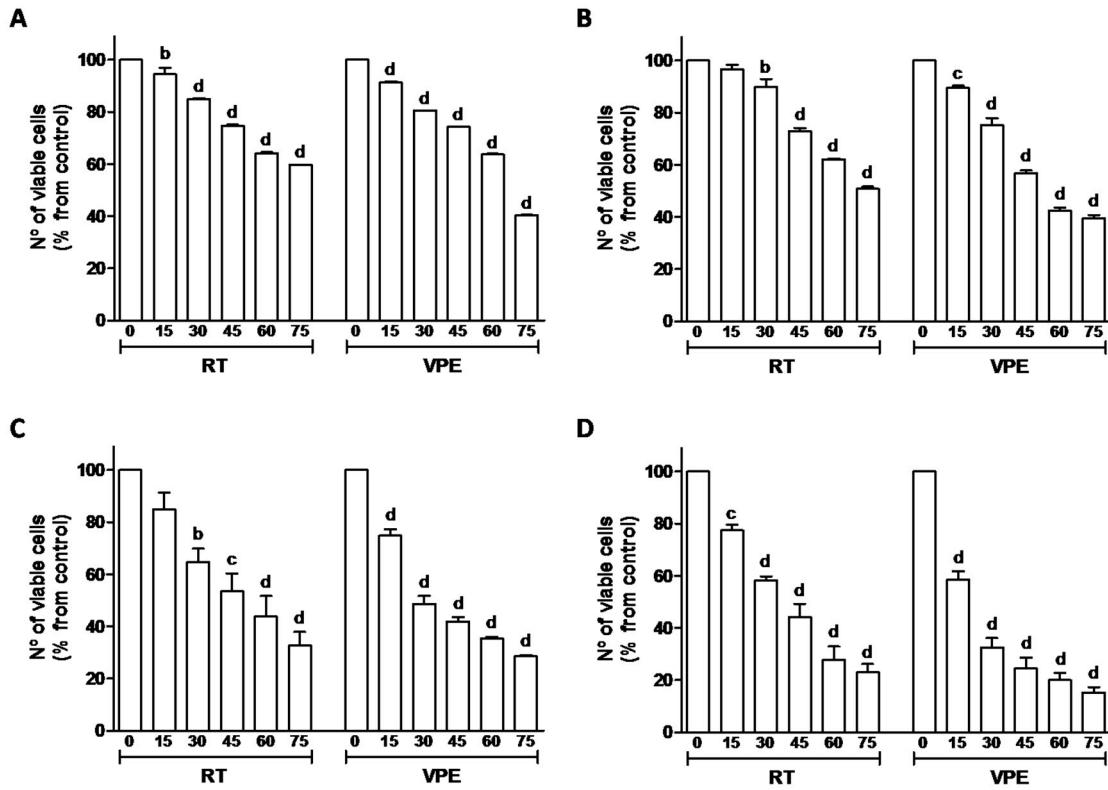

**Figure S1.** Effect of VPR extracts on cell viability of HCT116 (A&B) and RKO (C&D) cells, as measured by the MTT assay. Cells were incubated with different concentrations of RT and VPE for 24 h (A&C) or 48 h (B&D). Values are expressed as mean  $\pm$  SEM of three independent experiments. Letters represent statistical significance: **b**  $p \leq 0.01$ , **c**  $p \leq 0.001$ , **d**  $p \leq 0.0001$  when compared with control by one-way ANOVA.

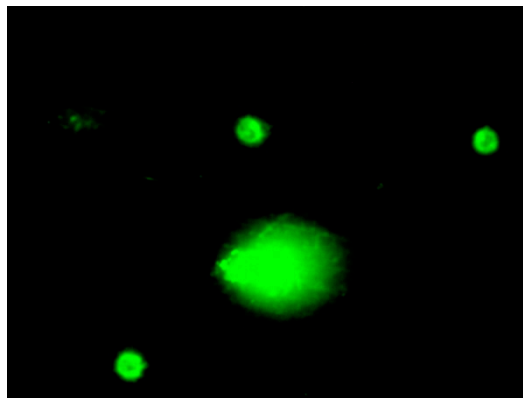

**Figure S2.** Representative image obtained by comet assay showing the DNA damage caused by 48h exposure to etoposide (ET, positive control).

**A**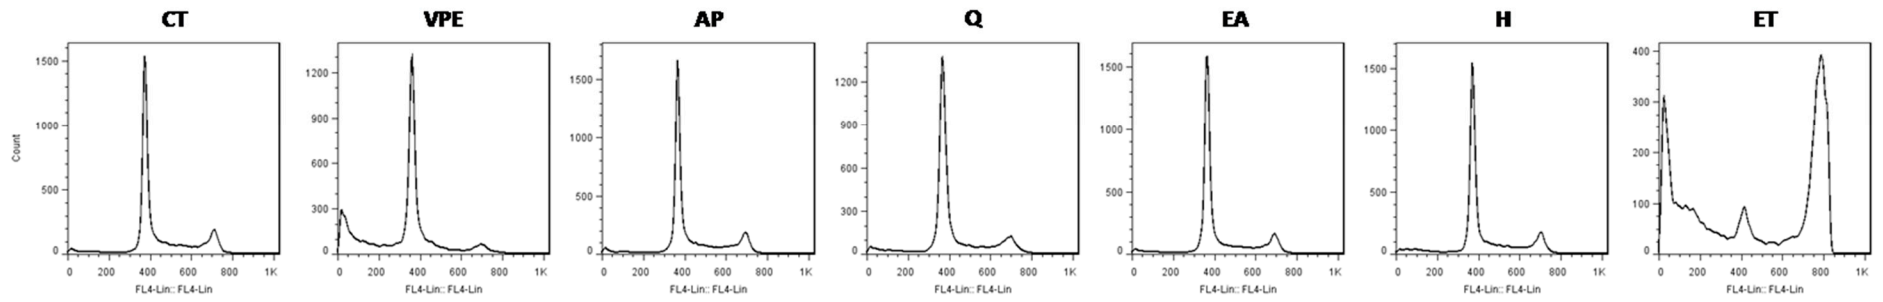**B**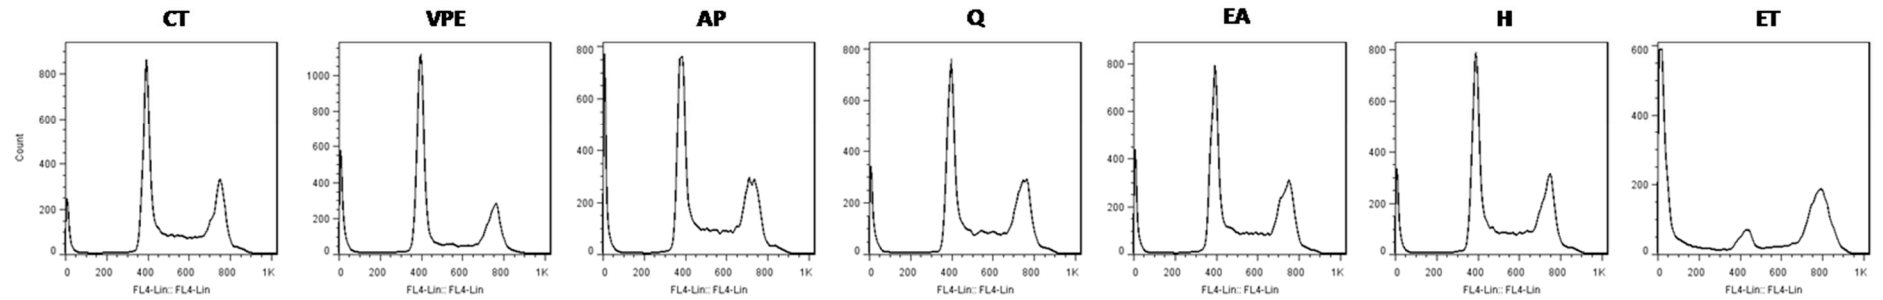

**Figure S3.** Representative histograms of the effect of VPE ( $IC_{50}$ ) and its major constituents on cell cycle of HCT116 (A) and RKO (B) cells for 48 h, as assessed by flow cytometry.
